# Supplementary material
Source: PubMed Central journal article supplement (PMC10829752)
Supplement: mmc2.pdf [file mmc2.pdf]

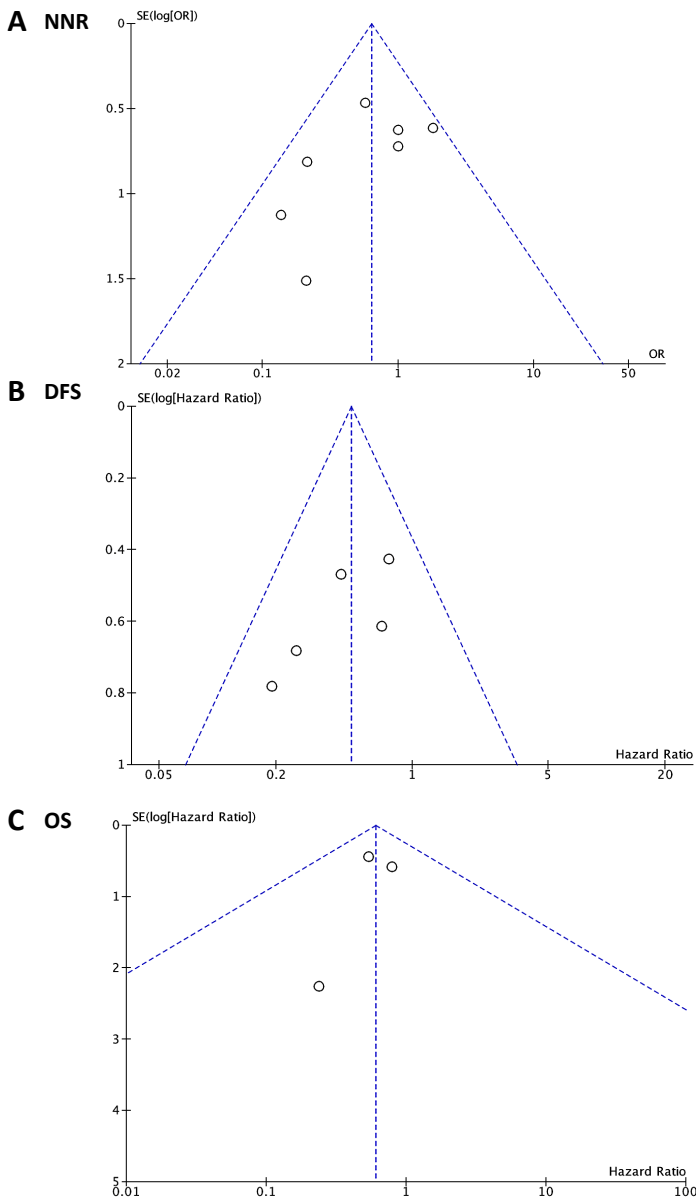

**Figure S1.** Begg's funnel plot of the association between elective neck dissection versus observation in cT1N0 oral squamous cell carcinoma and (A) neck nodal recurrence, (B) disease-free survival, and (C) overall survival.
